# Supplementary material for: Identification of novel genes associated with exercise and calorie restriction effects in skeletal muscle
Source: publisher site journal article supplement (doi:10.18632/aging.204793), 2023-06-12
Supplement: Supplementary file [file aging-v15i11-204793-supplementary-material-SD2.pdf]

## SUPPLEMENTARY TABLES

**Supplementary Table 1. List of primers.**

| Gene            | Forward                               | Reverse                               |
|-----------------|---------------------------------------|---------------------------------------|
| <i>Acadm</i>    | TTG AGT TGA CGG AAC AGC AG            | CCC CAA AGA ATT TGC TTC AA            |
| <i>Acca2</i>    | CTG ACG TAT ACT GAA CTG GTG TTG GAT G | TTT CCA GGC TAC CAT GCC AAT CTC       |
| <i>Acox1</i>    | ACT ACC TGG ACA GCC AAT GC            | CCC GAC TGA ACC TGG TCA TA            |
| <i>Acs11</i>    | CCA GAG GGG GAT TCA GGT GTC AAA T     | CTT TGT TCA CTA TGT AGG TGA TGG CGT C |
| <i>Adamt1</i>   | GAA GGC AAA CGA GTC CGC TAC A         | TTG GGT GTC CAC TCT ACA GTG G         |
| <i>Atp5b</i>    | TCCTGCCAGAGACTATGCG                   | GATGACTGCCACGATTCGC                   |
| <i>Cpeb1</i>    | GAC TCA GAC ACG AGT GGC TTC A         | ACG CCC ATC TTT AGA GGG TCT C         |
| <i>Cpeb2</i>    | GAG ATC ACT GCC AGC TTC CGA A         | CAA TGA GTG CCT GGA CTG AGC T         |
| <i>Cpeb3</i>    | CGG ACC GAT AAT GGT AAC AAT CTG       | CAG AGG CTC ATG GTC AGT CCT T         |
| <i>Cpeb4</i>    | TCA GCT CCA GAA GTA TGC TCG C         | GAG TGC ATG TCA AAC GTC CTG G         |
| <i>Egr2</i>     | CCT TTG ACC AGA TGA ACG GAG TG        | CTG GTT TCT AGG TGC AGA GAT GG        |
| <i>Fbxo32</i>   | ACA AGG GAA GTA CGA AGG AGC G         | GGC AGT CGA GAA GTC CAG TC            |
| <i>Irs2</i>     | CCA GTA AAC GGA GGT GGC TAC A         | CCA TAG ACA GCT TGG AGC CAC A         |
| <i>Ndufs1</i>   | AGG ATA TGT TCG CAC AAC TGG           | TCA TGG TAA CAG AAT CGA GGG A         |
| <i>Ndufs2</i>   | GCA AGG AAT TTG CAT AAG ACA GC        | TAG CCA TCC ATT CTG CCT TTG           |
| <i>Ndufs8</i>   | GGC ACG TGT TCC CTT CCT AC            | CCG CTC CAG GTA CAG ATT ATT GT        |
| <i>Nr4a1</i>    | GTG CAG TCT GTG GTG ACA ATG C         | CAG GCA GAT GTA CTT GGC GCT T         |
| <i>Ppargc1a</i> | GGA CAT GTG CAG CCA AGA CTC           | CAC TTC AAT CCA CCC AGA AAG CT        |
| <i>Pygo1</i>    | TGG ACT GGA TGG GTT AGG AGG G         | TGG TCG GAG TTT GGA TTC GGT G         |
| <i>Sdh</i>      | GGA CCT ATG GTG TTG GAT GC            | GTG TGC ACG CCA GAG TAT TG            |
| <i>Tfam</i>     | ATT CCG AAG TGT TTT TCC AGC A         | TCT GAA AGT TTT GCA TCT GGG T         |
| <i>Trim63</i>   | GTG TGA GGT GCC TAC TTG CTC           | GCT CAG TCT TCT GTC CTT GGA           |
| <i>Zbtb43</i>   | AGC ATC ATG GCT CAT AGG CGC T         | TCA GTG ACC TGG TGC TCA TCG T         |

**Supplementary Table 2. List of antibodies.**

| Primary antibody | Company | Cat#      |
|------------------|---------|-----------|
| MHC              | SCBT    | SC-376157 |
| Myogenin         | SCBT    | SC-52903  |
| HSP90            | BD      | 610418    |
| P62              | PROGEN  | GP62-C    |
| LC3-III          | CST     | 12741S    |
| P-AKT (S473)     | CST     | 9271L     |
| P-AKT (T308)     | CST     | 9275S     |
| AKT              | SCBT    | SC-1618   |
